# A Molecular Study on the Prevalence and Virulence Potential of *Aeromonas* spp. Recovered from Patients Suffering from Diarrhea in Israel

Yigal Senderovich<sup>1</sup>, Shifra Ken-Dror<sup>2</sup>, Irina Vainblat<sup>2</sup>, Dvora Blau<sup>2</sup>, Ido Izhaki<sup>1</sup>, Malka Halpern<sup>1,3\*</sup>

**1** Department of Evolutionary and Environmental Biology, Faculty of Natural Sciences, University of Haifa, Mount Carmel, Haifa, Israel, **2** Microbiology Laboratory of Clalit Health Services in Haifa, Haifa, Israel, **3** Department of Biology and Environment, Faculty of Natural Sciences, University of Haifa, Oranim, Tivon, Israel

## Abstract

**Background:** Species of the genus *Aeromonas* are native inhabitants of aquatic environments and have recently been considered emerging human pathogens. Although the gastrointestinal tract is by far the most common anatomic site from which aeromonads are recovered, their role as etiologic agents of bacterial diarrhea is still disputed. *Aeromonas*-associated diarrhea is a phenomenon occurring worldwide; however, the exact prevalence of *Aeromonas* infections on a global scale is unknown.

**Methodology/Principal Findings:** The prevalence and virulence potential of *Aeromonas* in patients suffering from diarrhea in Israel was studied using molecular methods. 1,033 diarrheal stools were sampled between April and September 2010 and *Aeromonas* species were identified in 17 (~2%) patients by sequencing the *rpoD* gene. *Aeromonas* species identity and abundance was: *A. caviae* (65%), *A. veronii* (29%) and *Aeromonas taiwanensis* (6%). This is the first clinical record of *A. taiwanensis* as a diarrheal causative since its recent discovery from a wound infection in a patient in Taiwan. Most of the patients (77%) from which *Aeromonas* species were isolated were negative for any other pathogens. The patients ranged from 1 to 92 years in age. *Aeromonas* isolates were found to possess different virulence-associated genes: *ahpB* (88%), *pla/lip/lipH3/apl-1* (71%), *act/hlyA/aerA* (35%), *alt* (18%), *ast* (6%), *fla* (65%), *lafA* (41%), TTSS *ascV* (12%), TTSS *ascF-ascG* (12%), TTSS-dependent ADP-ribosylating toxins *aexU* (41%) and *aexT* (6%) in various combinations. Most of the identified strains were resistant to beta-lactam antibiotics but susceptible to third-generation cephalosporin antibiotics.

**Conclusions:** *Aeromonas* may be a causative agent of diarrhea in patients in Israel and therefore should be included in routine bacteriological screenings.

**Citation:** Senderovich Y, Ken-Dror S, Vainblat I, Blau D, Izhaki I, et al. (2012) A Molecular Study on the Prevalence and Virulence Potential of *Aeromonas* spp. Recovered from Patients Suffering from Diarrhea in Israel. PLoS ONE 7(2): e30070. doi:10.1371/journal.pone.0030070

**Editor:** Patrick C. Y. Woo, The University of Hong Kong, China

**Received:** August 7, 2011; **Accepted:** December 12, 2011; **Published:** February 15, 2012

**Copyright:** © 2012 Senderovich et al. This is an open-access article distributed under the terms of the Creative Commons Attribution License, which permits unrestricted use, distribution, and reproduction in any medium, provided the original author and source are credited.

**Funding:** This study was supported by the Research Authority, University of Haifa, Israel. The funders had no role in study design, data collection and analysis, decision to publish, or preparation of the manuscript.

**Competing Interests:** The authors have declared that no competing interests exist.

\* E-mail: mhalpern@research.haifa.ac.il

## Introduction

*Aeromonas* species are waterborne, Gram-negative, oxidase-positive, rod-shaped bacteria that are ubiquitous in water. This includes chlorinated drinking water, as the bacteria can grow and survive in biofilms in the water distribution systems [1]. The prevalence of *Aeromonas* species in the aquatic environment has been recognized as a potential health risk, and some countries have adopted aeromonad counts as an additional indicator of water quality [2].

The most common clinical manifestations of *Aeromonas* infections are diarrhea, bacteremia and localized soft-tissue infections [3]. Patients may acquire *Aeromonas* infections both in community and hospital settings [3–5]. Both immunocompetent and immunocompromised patients are susceptible to *Aeromonas* infections [3,6]. The gastrointestinal tract is by far the most common anatomic site from which aeromonads are recovered [3,6]. *Aeromonas* have been isolated from children with acute diarrhea and from adults with

traveler's diarrhea [3,6–8]. The following species are frequently associated with diarrhea in humans: *A. hydrophila*, *A. veronii* bv. *sobria* and *A. cavia* [3,6,9,10,11].

The mechanism of *Aeromonas* pathogenesis is complex and not well understood. *Aeromonas* virulence is considered to be multifactorial. The virulence factors that were associated with *Aeromonas* pathogenicity are: cytotoxic enterotoxin, haemolysins, proteases [serine protease (*aspA*), elastase (*ahpB*)], lipases (*pla* and *plc*, *sat*), DNAses and adhesins [type IV pili and polar flagella (*flaA* and *flaB*)] [1,6,9,10,12,13]. Several of these virulence factors have been identified in strains isolated from water [1]. In addition, genes for a type III secretion system (TTSS) were identified in this genus [14,15]. TTSS has a role in delivering toxins directly into the host cell and in inducing apoptosis [14,15].

In Israel, diarrhea patients are tested routinely by clinical laboratories for the presence of several bacterial pathogens, such as: *Campylobacter* spp., *Shigella* spp. and *Salmonella* spp., but not for *Aeromonas*. The aim of this research was to study the prevalence

and virulence potential of *Aeromonas* spp. in diarrheal stools in Israel.

## Materials and Methods

### Ethics Statement

N/A. The data was analyzed anonymously.

We have applied to the ethics committee at Carmel Hospital, Clalit Health Services, Haifa, Israel, and the committee stated that such a research does not fall under the scope of the Helsinki Committee.

### *Aeromonas* Prevalence in Diarrheal Stools

The presence of *Aeromonas* was monitored in fecal specimens from diarrheal patients submitted to the Microbiology Laboratory of Clalit Health Services in Haifa. This Laboratory provides services to a wide range of population, from the district of Haifa and West Galilee in Israel (this is a community health service, not a hospital). The surveillance was conducted between April 13 and September 15, 2010 (five months). All specimens were checked routinely for the following enteropathogens: *Shigella*, *Salmonella* and *Campylobacter* spp. were isolated and identified by conventional methods [16]; *Rotavirus* was detected by an antigen detection method (Novamed, Israel); parasites were studied according to methods described in Garcia and Isenberg [17]. For the isolation of *Aeromonas* spp. the fecal specimens were either enriched in alkaline peptone water (APW) containing peptone (1%, wt/vol) and NaCl (1%, wt/vol) pH 8.5, or directly streaked on a selective m-*Aeromonas* agar base (Havelaar Biolife, Milano, Italy). In the case of enrichment, the tubes were incubated at 37°C without shaking for 6–18 h, and then streaked on m-*Aeromonas* selective agar. The agar plates were incubated overnight at 37°C. Colonies that were morphologically suspected as *Aeromonas* (yellow, smooth and rounded) were subcultured onto LB agar (Himedia, India), and then tested for oxidase (1% tetramethyl-phenylenediamine, Sigma). The identity of the isolates with positive results was further verified by *Aeromonas* genus specific PCR assay in accordance with Kong et al. (1999) [18]. Reddy Mix PCR master mixture (ABgene, Epsom, UK) was used for the DNA amplification. All the isolates that were found to belong to the *Aeromonas* genus were maintained in LB with 30% glycerol (–80°C).

*Aeromonas* isolates were further identified by amplifying and sequencing the housekeeping gene *rpoD*, encoding  $\sigma^{70}$  factor, which is one of the sigma factors that confer promoter-specific transcription initiation on RNA polymerase [19]. The PCR products were sequenced by MCLAB (San Francisco, CA). Newly determined sequences were compared to those available in the GenBank database, using the standard nucleotide–nucleotide BLAST program (BLASTN; <http://www.ncbi.nlm.nih.gov>), to ascertain their closest relatives. The sequences were submitted to the GenBank database under accession numbers JF738005–JF738021. A phylogenetic tree was generated using the neighbor-joining method with NJPlot (MEGA 4.1) based on alignments from CLUSTAL W.

### Virulence Factors and Antimicrobial Susceptibility

The presence of the following genes encoding virulence factors was determined in all *Aeromonas* isolates: cytotoxic enterotoxin (*act*)/aerolysin (*aerA*)/haemolysin (*hlyA*) by using one set of primers AHCF1/AHCR1 [12]; *alt* and *ast* genes for cytotoxic enterotoxins; *ahyB* gene for elastase; *pla/lipH3/apl-1/lip* genes for phospholipase; and *fla* gene for flagellin [1]. The presence of the genes *act/aerA/hlyA* and *ast*; *fla* and *alt*; *ahyB* and *pla/lipH3/apl-1/lip* was tested simultaneously in the same reaction mixture, in accordance with

Sen and Rodgers (2004) [1]. The presence of genes encoding the components of the type III secretion system, *ascV*, *ascF-ascG* [15], type III secretion dependent ADP-ribosylating toxins, *aexT* and *aexU* [20], and of *lafA* gene encoding a lateral flagella [13] was determined as well.

The disk diffusion antimicrobial susceptibility tests were performed by a standardized method [21,22]. All disks were purchased from OXOID (UK).

## Results

### *Aeromonas* Prevalence in Diarrheal Stools

A total of 1,033 stool specimens from patients suffering from diarrhea were monitored for the presence of *Aeromonas* during a five month period between April 13 and September 15, 2010. Seventeen patients (~2%) tested positive for *Aeromonas* species which included 11 (65%) *A. caviae*, five (29%) *A. veronii*, and one strain, (H53AQ1). This strain showed the highest *rpoD* gene similarity (96%) to the deposited sequence of the type strain of *A. taiwanensis*, and clustered with this species in the phylogenetic tree (Figure 1).

The specimens of the diarrhea patients were also checked for other enteropathogens. The results revealed that pathogenic bacteria, *Rotavirus* and parasites were recovered from about 15% (155 of 1033) of the diarrhea patients. The prevalence of the detected enteropathogens was; *Campylobacter* sp. 5.2%, *Shigella* 3.3%, *Salmonella enterica* 2%, *Aeromonas* spp. 2%, *Rotavirus* 0.4%, *Giardia lamblia* 2.3%, and *Cryptosporidium parvum* 0.15%. Mixed infections were found in four patients that were positive for *Aeromonas* as well as for other known enteropathogens (Table S1).

### Virulence Factors and Antimicrobial Susceptibility

All *Aeromonas* isolates were screened for the presence of virulence genes (Table 1). The most prevalent genes were *ahyB* (88%) and *pla/lipH3/apl-1/lip* (71%). The two types of flagella that were screened (polar and lateral) were quite prevalent as well (65% and 41%, respectively). In every strain that was positive for the genes encoding the TTSS, a gene for the effector *aexU* was present as well. The *ast* gene was found only in one isolate (H65AT3), which was identified as *A. veronii*. The virulence genotypes were found in different combinations: three isolates (18%) possessed five different genes, four (24%) possessed three or four different genes and two (12%) possessed two different genes (Table 1).

The susceptibility of *Aeromonas* isolates was evaluated against 15 antimicrobial agents. All isolates were susceptible to amikacin, cefotaxime, ceftazidime, ceftriaxone, ciprofloxacin and chloramphenicol; however, they varied in their susceptibility to other antimicrobial agents (Table 2). The three *Aeromonas* species displayed the same antibiotic sensitivity patterns.

## Discussion

Despite the existence of detailed case reports and epidemiological case control investigations, the role of *Aeromonas* as the etiological agent of bacterial diarrhea has been questioned and debated several times [3,6,11,23–27]. Figueras et al. [26] rebutted arguments provided by several authors against considering *Aeromonas* a true enteropathogenic bacterium one by one. Today it is well accepted that if *Aeromonas* can cause different infections like cellulitis, meningitis, pneumonia, wound infections and more in healthy humans, it can also have the capacity to produce diarrhea [3,6,26].

In several reported studies throughout the world, *Aeromonas* species have been isolated at a rate of 0.6 to 7.2% in patients with diarrhea, predominantly in infants and children [2,27]. In the current study, *Aeromonas* positive patients ranged in age and only

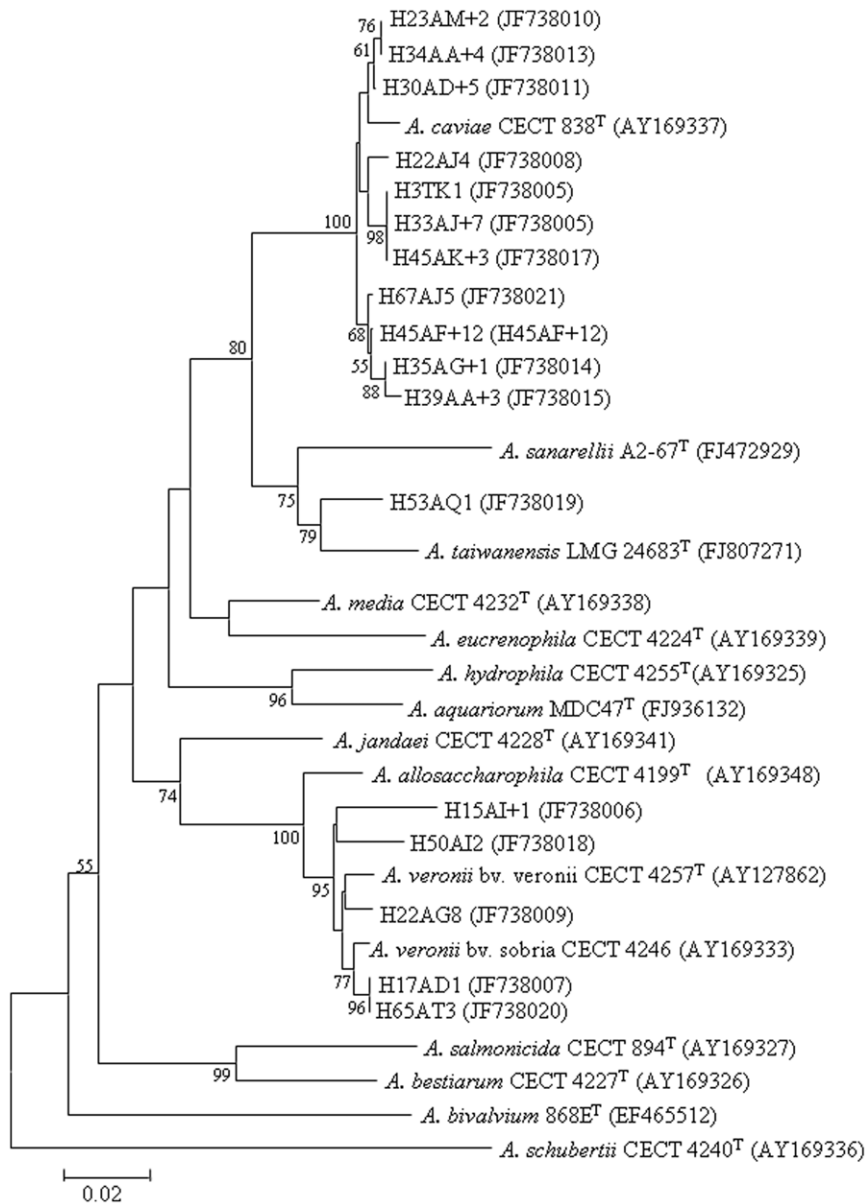

**Figure 1. Phylogenetic tree of *Aeromonas* isolates recovered from diarrhea patients.** The tree shows the relationships based on partial sequences of *rpoD* gene of type strains of *Aeromonas* species and the isolates from the current study. The sequence alignments were performed using the CLUSTAL W program, and the tree was generated using the neighbor-joining method with Kimura 2 parameter distances in MEGA 4.1 software. Bootstrap values (from 1,000 replicates) greater than 50% are shown at the branch points. The bar indicates 2% sequence divergence. doi:10.1371/journal.pone.0030070.g001

two out of 17 isolates were taken from children (Table S1). The current study relied on a limited amount of strains as it was performed only during a period of five months; however, the *Aeromonas* isolation rate amounted to about 2%, which is similar to the rate obtained in other studies performed in other countries [3,6 and references therein], as well as in Israel in 1990 [28]. In a recent study performed by Pablos et al. [29] in León (Spain) they found a frequency of *Aeromonas* of 4% (32 positive patients of the 800 investigated), mainly associated with infant or pediatric patients (68.8%). Furthermore they found mixed infections with other pathogens in 12 patients [29]. In our study, only two of the patients were infants (12%), and all four patients that had mixed infections were adults (Table S1).

In mixed infections, *Aeromonas* may be transient colonizers lacking a causal relationship with a disease, but in some cases, multiple pathogens may act synergistically to produce diarrhea [30]. *Aeromonas* species are carried asymptotically by some individuals [3,6] as occurs with other recognized enteropathogens like *Salmonella*. However, a study that was performed in 1990 in Israel compared the prevalence of *Aeromonas* in the stools obtained from 932 adult patients with acute diarrhea (recovered between 1986 and 1987) to 500 stools from asymptomatic controls. They found an *Aeromonas* prevalence of about 2% in the diarrhea cases, which conforms to our study. But no *Aeromonas* were detected in the controls [28]. This seems to indicate a clear association of *Aeromonas* with diarrhea cases in Israel, as we found in our study.

**Table 1.** Prevalence of virulence genes in *Aeromonas* isolates from diarrheal patients.

| Isolate name | Virulence genes |                            |                      |            |            |            |             |                     |                          |             |             |
|--------------|-----------------|----------------------------|----------------------|------------|------------|------------|-------------|---------------------|--------------------------|-------------|-------------|
|              | <i>ahpB</i>     | <i>pla/lip/lipH3/apl-1</i> | <i>act/aerA/hlyA</i> | <i>ast</i> | <i>alt</i> | <i>fla</i> | <i>lafA</i> | TTSS<br><i>ascV</i> | TTSS<br><i>ascF-ascG</i> | <i>aexT</i> | <i>aexU</i> |
| H3TK1        | +               | +                          | -                    | -          | -          | +          | -           | -                   | -                        | -           | -           |
| H15AI+1      | +               | +                          | +                    | -          | +          | -          | -           | -                   | -                        | -           | -           |
| H17AD1       | -               | -                          | +                    | -          | +          | +          | -           | -                   | -                        | +           | -           |
| H22AJ4       | +               | +                          | -                    | -          | -          | -          | -           | -                   | -                        | -           | -           |
| H22AG8       | -               | -                          | +                    | -          | -          | +          | -           | +                   | +                        | -           | +           |
| H23AM+2      | +               | +                          | +                    | -          | -          | +          | +           | -                   | -                        | -           | -           |
| H30AD+5      | +               | +                          | -                    | -          | -          | -          | +           | -                   | -                        | -           | -           |
| H33AJ+7      | +               | -                          | -                    | -          | -          | +          | -           | -                   | -                        | -           | +           |
| H34AA+4      | +               | +                          | +                    | -          | -          | +          | +           | -                   | -                        | -           | -           |
| H35AG+1      | +               | +                          | -                    | -          | -          | +          | +           | -                   | -                        | -           | -           |
| H39AA+3      | +               | +                          | -                    | -          | +          | -          | -           | -                   | -                        | -           | +           |
| H45AF+12     | +               | +                          | -                    | -          | -          | +          | +           | -                   | -                        | -           | +           |
| H45AK+3      | +               | +                          | -                    | -          | -          | +          | -           | -                   | -                        | -           | -           |
| H50AI2       | +               | +                          | +                    | -          | -          | +          | -           | +                   | -                        | -           | +           |
| H53AQ1       | +               | -                          | -                    | -          | -          | +          | -           | -                   | +                        | -           | +           |
| H65AT3       | -               | +                          | -                    | +          | -          | -          | +           | -                   | -                        | -           | -           |
| H67AJ5       | +               | +                          | -                    | -          | -          | -          | +           | -                   | -                        | -           | +           |

For more details on the isolates and on the patients see Table S1.  
doi:10.1371/journal.pone.0030070.t001

Among the recognized *Aeromonas* species, *A. veronii* by *sobria*, *A. caviae* and *A. hydrophila* are more frequently associated with diarrhea in humans, representing 85% of clinical isolates [11]. Interestingly, none of the identified strains in the current study belonged to *A. hydrophila*. This is in agreement with the false

importance attributed to this species on the basis of phenotypic identifications [3,26]. In the current study, *A. caviae* was the predominating species (65%, 11/17), followed by *A. veronii* that was isolated from five patients (29%). One patient carried a strain that was identified as *A. taiwanensis* (Figure 1). All the strains were

**Table 2.** Susceptibility of *Aeromonas* isolates to antimicrobial agents.

| Antimicrobial agent<br>(number of strains tested) | Number (%) of strains |                         |           |
|---------------------------------------------------|-----------------------|-------------------------|-----------|
|                                                   | susceptible           | intermediate resistance | resistant |
| amikacin (11)                                     | 11 (100)              | -                       | -         |
| cefotaxime (11)                                   | 11 (100)              | -                       | -         |
| ceftazidime (11)                                  | 11 (100)              | -                       | -         |
| ceftriaxone (E test) (11)                         | 11 (100)              | -                       | -         |
| ciprofloxacin (11)                                | 11 (100)              | -                       | -         |
| chloramphenicol (11)                              | 11 (100)              | -                       | -         |
| gentamicin (11)                                   | 10 (91)               | -                       | 1 (9)     |
| piperacillin-tazobactam (11)                      | 10 (91)               | -                       | 1 (9)     |
| trimethoprim-sulfamethoxazole (11)                | 10 (91)               | -                       | 1 (9)     |
| imipenem (also meropenem) (11)                    | 8 (73)                | -                       | 3 (27)    |
| cefoxitin (10)                                    | 7 (70)                | 2 (20)                  | 1 (10)    |
| nalidixic acid (11)                               | 7 (64)                | -                       | 4 (36)    |
| tetracycline (11)                                 | 6 (55)                | -                       | 5 (45)    |
| amoxicillin+clavulanic acid (11)                  | 3 (27)                | 3 (27)                  | 5 (46)    |
| cephalotin (10)                                   | 2 (20)                | -                       | 8 (80)    |

Most of the identified strains were resistant to beta-lactam antibiotics but susceptible to third-generation cephalosporin antibiotics.  
doi:10.1371/journal.pone.0030070.t002

identified using the *rpoD* gene sequencing method. *Aeromonas* identification on the basis of *rpoD* gene sequencing is considered to be much more accurate than 16S rRNA gene sequencing or biochemical identification methods. The fact that many studies found *A. hydrophila* a major species to cause diarrhea (among *Aeromonas* species) may be due to limitations in the identification methods that were used in those studies [3,26].

The current study provides the first clinical record of *A. taiwanensis* as a diarrheal causative since this species was identified [31]. So far, the only available strain (the type strain) was recovered from an infected burn wound of a 40 years old male [31] and in the current study the strain was isolated from feces of a 35 years old diarrheal female patient.

The clinical manifestations of *Aeromonas* associated gastroenteritis can range from mild self-limiting watery diarrhea to a more severe and invasive dysenteric form. Chronic diarrhea episodes and isolated cases of a cholera-like illness have also been described [11]. The bacterial flagella are thought to play an important role in pathogenicity. *Aeromonas* produces two types of flagella: a constitutively expressed polar flagellum (*fla*) and multiple inducible lateral flagella (*laf*). Both types play a role in the attachment of the bacteria to the gastrointestinal epithelium, biofilm formation and long-term colonization [6]. Both types of flagella (*fla* and *lafA*) were common among the *Aeromonas* isolates from the patients in the current study (Table 1). The occurrence of genes encoding hemolytic, cytotoxic, cytotoxic, and enterotoxic activities (*aerA*, *hlyA*, *alt*, *ast*, *act*) may contribute to diarrheal-related virulence [6,31,32]. In the present study, 35% of the *Aeromonas* isolates possessed the *act/aerA/hlyA* gene. The most prevalent virulence-associated genes in the isolates from our study were *ahpB* for elastase (88%) and *pla/lip/lipH3/apl-1* for lipase (71%) (Table 1). These genes may be essential for the ability of the bacterium to adhere and invade the intestinal mucosa [1].

Type III secretion system (TTSS) plays crucial roles in host-pathogen interactions [14,15]. One of the best-described toxins that are translocated via a TTSS is the ADP-ribosylating toxin, AexT. This toxin was found to be more common among the environmental, rather than the clinical *Aeromonas* strains [13]. In our study, the gene for this toxin was detected only in one strain. Recently, a novel type-three-secretion-dependent effector, AexU, was discovered in *Aeromonas*. AexU is an ADP-ribosylating toxin and is required for virulence of *Aeromonas hydrophila* in mice [20]. The gene for this toxin was quite prevalent among the strains in our study (41%). The prevalence of the genes encoding TTSS apparatus (12%) was lower than the *aexU* gene prevalence (41%). The TTSS is probably underrepresented, as may happen in PCR based studies. Nevertheless, the presence of *aexU* gene strengthens the case of *Aeromonas* being recognized as a stronger pathogen.

In another study that surveyed the distribution of virulence associated genes among *Aeromonas* species from human stool

specimens in Spain, it was found that *alt*, *ast*, *laf*, *aerA*, and *hlyA* genes were present in 72, 19, 3, 25, and 28% of the strains, respectively. None of the strains harbored *ascF–G* [29]. In clinical diarrhea isolates of *A. hydrophila* in Spain the distribution of associated virulence genes was different: *alt* – 82%, *ast* – 96%, *laf* – 77%, *aexT* – 5%, *ascV* – 5% [13].

*Aeromonas* species are known to be intrinsically susceptible to all antibiotics active against non-fastidious Gram-negative bacilli, except for many beta-lactams, due to the production of multiple inducible, chromosomally encoded  $\beta$ -lactamases [33]. In our study, most strains (80%) were resistant to cephalotin and partially resistant to amoxicillin combined with clavulanic acid (46%) (Table 2). All strains were susceptible to third-generation cephalosporin antibiotics (cefotaxime, ceftazidime, ceftriaxone), second-generation fluoroquinolone antibiotics – ciprofloxacin, aminoglycoside antibiotic – amikacin, and to chloramphenicol.

Recently, it was found that the egg masses of chironomids, non-biting midges, (*Diptera*; *Chironomidae*) serve as a natural reservoir for *Aeromonas* pathogenic species [34,35] as well as for *Vibrio cholerae* [36]. Chironomid infestations in drinking water supply systems are an existing problem in Israel [37] and worldwide [38]. Chironomids may disseminate pathogenic species of *Aeromonas* between drinking water reservoirs, as was suggested for *V. cholerae* [39].

The source of *Aeromonas* in diarrheal patients was not investigated in the current study. In order to investigate the route of transmission of *Aeromonas* pathogenic strains an extensive study on strains from various origins should be performed. Chironomid egg masses in drinking water ponds and tap waters should be screened for *Aeromonas* isolates and compared with isolates from diarrheal patients.

*Aeromonas* infections are self-limiting, but their diagnosis may be crucial in young children, old and immunocompromised patients. We conclude that *Aeromonas* may be a causative agent of diarrhea in patients in Israel and therefore should be included in routine bacteriological screenings.

## Supporting Information

**Table S1 Characterization of *Aeromonas* isolates from diarrheal patients.** *Aeromonas rpoD* sequences were deposited in the GenBank database under the accession numbers JF738005–JF738021 (see also Figure 1). (DOC)

## Author Contributions

Conceived and designed the experiments: YS SKD MH. Performed the experiments: YS SKD IV DB. Analyzed the data: YS SKD II MH. Contributed reagents/materials/analysis tools: SKD II MH. Wrote the paper: YS SKD MH.

## References

- Sen K, Rodgers M (2004) Distribution of six virulence factors in *Aeromonas* species isolated from US drinking water utilities: a PCR identification. *J Appl Microbiol* 97: 1077–1086.
- Borchardt MA, Stemper ME, Standridge JH (2003) *Aeromonas* isolates from human diarrheic stool and groundwater compared by pulsed-field gel electrophoresis. *Emerg Infect Dis* 9: 224–228.
- Figueras MJ (2005) Clinical relevance of *Aeromonas* sM503. *Rev Med Microbiol* 16: 145–153.
- Essers B, Burnens AP, Lanfranchini FM, Somaruga SGE, von Vigier RO, et al. (2000) Acute community-acquired diarrhea requiring hospital admission in Swiss children. *Clin Infect Dis* 30: 192–196.
- Anaissie EJ, Penzak SR, Dignani MC (2002) The hospital water supply as a source of nosocomial infections: a plea for action. *Arch Intern Med* 162: 1483–1492.
- Janda JM, Abbott SL (2010) The Genus *Aeromonas*: taxonomy, pathogenicity, and infection. *Clin Microbiol Rev* 23: 35–73.
- Echeverria P, Blocklow NR, Sanford IB, Cakor GG (1981) Traveler's diarrhea among American Peace Corps volunteers in rural Thailand. *J Infect Dis* 143: 767–771.
- Burke V, Gracey M, Robinson J, Peck D, Beaman J, et al. (1983) The microbiology of childhood gastroenteritis: *Aeromonas* species and other infective agents. *J Infect Dis* 148: 68–74.
- Ormen O, Regue MQ, Tomas JM, Granum PE (2003) Studies of aerolysin promoters from different *Aeromonas* spp. *Microb Pathog* 35: 189–196.
- Agarwal RK, Kapoor KN, Kumar A (1998) Virulence factors of aeromonads – an emerging food borne pathogen problem. *J Commun Dis* 30: 71–78.
- Janda JM, Abbott SL (1998) Evolving concepts regarding the genus *Aeromonas*: an expanding panorama of species, disease presentations, and unanswered questions. *Clin Infect Dis* 27: 332–344.
- Kingombe CI, Huys G, Tonolla M, Albert MJ, Swings J, et al. (1999) PCR detection, characterization, and distribution of virulence genes in *Aeromonas* spp. *Appl Environ Microbiol* 65: 5293–5302.

13. Aguilera-Arreola G, Hernandez-Rodriguez C, Zuniga G, Figueras MJ, Castro-Escarpulli G (2005) *Aeromonas hydrophila* clinical and environmental ecotypes as revealed by genetic diversity and virulence genes. FEMS Microbiol Lett 242: 231–240.
14. Yu HB, Srinivasa Rao PS, Lee HC, Vilches S, Merino S, et al. (2004) A type III secretion system is required for *Aeromonas hydrophila* AH-1 pathogenesis. Infect and Immun 72: 1248–1256.
15. Chacón M, Soler L, Groisman E, Guarro J, Figueras MJ (2004) Type III secretion system genes in clinical *Aeromonas* isolates. J Clin Microbiol 42: 1285–1287.
16. Murray PR, Baron EJ, Jorgensen JH, Pfaller MA, Tenover FC, Tenover FC (2003) Manual of Clinical Microbiology, 8<sup>th</sup> ed. Washington, D. C.: ASM press. pp 654–671 and 902–914.
17. Garcia LS, Isenberg HD (2010) Clinical Microbiology Procedures Handbook, 3<sup>rd</sup> ed. Washington, D. C.: ASM press. Section 9.
18. Kong R, Pelling A, So C, Wu R (1999) Identification of oligonucleotide primers targeted at the 16S–23S rDNA intergenic spacers for genus-and species-specific detection of aeromonads. Mar Pollut Bull 38: 802–808.
19. Soler L, Yanez MA, Chacon MR, Aguilera-Arreola MG, Catalan VM, et al. (2004) Phylogenetic analysis of the genus *Aeromonas* based on two housekeeping genes. Int J Syst Evol Microbiol 54: 1511–1519.
20. Silver AC, Graf G (2009) Prevalence of genes encoding the Type Three Secretion System and the effectors AexT and AexU in the *Aeromonas veronii* group. DNA Cell Bio 28: 383–388.
21. Miller R, Walker R, Baya A, Clemens K, Coles M, et al. (2003) Antimicrobial susceptibility testing of aquatic Bacteria: quality control disk diffusion ranges for *Escherichia coli* ATCC 25922 and *Aeromonas salmonicida* subsp. *salmonicida* ATCC 33658 at 22 and 28°C. J Clin Microbiol 41: 4318.
22. Jorgensen JH (2010) Methods for antimicrobial dilution and disk susceptibility testing of infrequently isolated or fastidious Bacteria. Approved Guideline. Clinical and Laboratory Standards Institute. CLSI/NCCLS M45-A2.
23. Ogunsanya T, Rotimi V, Adenuga A (1994) A study of the aetiological agents of childhood diarrhoea in Lagos, Nigeria. J Med Microbiol 40: 10–14.
24. Janda JM, Abbott SL (2006) New gram-negative enteropathogens: fact or fancy? Rev Med Microbiol 17: 27–37.
25. Morgan D, Johnson P, DuPont H, Satterwhite T, Wood L (1985) Lack of correlation between known virulence properties of *Aeromonas hydrophila* and enteropathogenicity for humans. Infect Immun 50: 62–65.
26. Figueras MJ, Horneman AJ, Martinez-Murcia A, Guarro J (2007) Controversial data on the association of *Aeromonas* with diarrhea in a recent Hong Kong study. J Med Microbiol 56: 996–998.
27. Moyer NP (1987) Clinical significance of *Aeromonas* species isolated from patients with diarrhea. J Clin Microbiol 25: 2044–2048.
28. Golik A, Modai D, Gluskin I, Schechter I, Cohen N, et al. (1990) *Aeromonas* in adult diarrhea: an enteropathogen or an innocent bystander? J Clin Gastroenterol 12: 148–152.
29. Pablos M, Remacha MA, Rodríguez-Calleja JM, Santos JA, Otero A, et al. (2010) Identity, virulence genes, and clonal relatedness of *Aeromonas* isolates from patients with diarrhea and drinking water. Eur J Clin Microbiol Infect Dis 29: 1163–1172.
30. Albert MJ, Ansaruzzaman M, Talukder KA, Chopra AK, Kuhn I, et al. (2000) Prevalence of enterotoxin genes in *Aeromonas* spp. isolated from children with diarrhea, healthy controls, and the environment. J Clin Microbiol 38: 3785–3790.
31. Alperi A, Martínez-Murcia AJ, Ko WC, Monera A, Saavedra M, et al. (2010) *Aeromonas taiwanensis* sp. nov. and *Aeromonas sanarellii* sp. nov., clinical species from Taiwan. Int J Syst Evol Microbiol 60: 2048–2055.
32. Heuzenroeder MW, Wong CYF, Flower RLP (1999) Distribution of two hemolytic toxin genes in clinical and environmental isolates of *Aeromonas* spp.: correlation with virulence in a suckling mouse model. FEMS Microbiol Lett 174: 131–136.
33. Jones BL, Wilcox MH (1995) *Aeromonas* infections and treatment. J antimicrob chemother 35: 453–461.
34. Senderovich Y, Gershtein Y, Halewa E, Halpern M (2008) *Vibrio cholerae* and *Aeromonas*: do they share a mutual host? ISME J 2: 276–83.
35. Figueras MJ, Beaz-Hidalgo R, Senderovich Y, Laviad S, Halpern M (2011) Re-identification of *Aeromonas* isolates from chironomid egg masses as the potential pathogenic bacteria *Aeromonas aquariorum*. Environ Microbiol Rep 3: 239–244.
36. Broza M, Halpern M (2001) Chironomid egg masses and *Vibrio cholerae*. Nature 412: 40.
37. Halpern M, Gasith A, Broza M (2002) Does the tube of a benthic chironomid larva play a role in protecting its dweller against chemical toxicants? Hydrobiologia 470: 49–55.
38. Sun XB, Cui FY, Zhang JS, Xu F, Liu LJ (2007) Inactivation of chironomid larvae with chlorine dioxide. J Hazard Mater 142: 348–353.
39. Broza M, Gancz H, Halpern M, Kashi Y (2005) Adult non-biting midges: possible windborne carriers of *Vibrio cholerae* non-O1 non-O139. Environ Microbiol 7: 576–585.
